# Supplementary material for: Re-Starting the Cruise Sector during the COVID-19 Pandemic in Greece: Assessing Effectiveness of Port Contingency Planning
Source: MDPI journal article supplement (doi:10.3390/ijerph192013262), 2022-10-14
Supplement: s1 [file s1]

## Relevant documentation for COVID-19 public health emergency contingency plan (PHECP) development

---

### **Introductory note:**

The structured checklist below was prepared to support *Port A's* multidisciplinary core planning team to identify, collect and review relevant documentation prior to revision of the COVID-19 specific port PHECP.

It indicates a suggested\*\* list of documentation to:

- *Inform the planning process*
- *Provide context to the current legal frameworks, operational plans and processes in which Port A operates*
- *Facilitate interoperability of Port A's COVID-19 specific plan with existing health and emergency plans*
- *Further understanding of the port profile of Port A*

Suggested documentation for review addresses different:

1. Levels (local, regional, national, international)
2. Formats (legislation, regulations, policies, guidance documents operational plans, external service agreements)
3. Topics (COVID-19 and other public health risks, emergency/crisis response, maritime/port operations)

\*\*This list is non-exhaustive and can be modified as required.

| Relevant documentation                                                     | Competent authority | Document title (available from)                                                                                                                                                             | Collected                                                   | Reviewed                                                    | Relevant remarks |
|----------------------------------------------------------------------------|---------------------|---------------------------------------------------------------------------------------------------------------------------------------------------------------------------------------------|-------------------------------------------------------------|-------------------------------------------------------------|------------------|
| International health legislation                                           |                     | e.g. International Health Regulations (IHR) 2005                                                                                                                                            | <input type="checkbox"/> Yes<br><input type="checkbox"/> No | <input type="checkbox"/> Yes<br><input type="checkbox"/> No |                  |
| European health legislation                                                |                     | e.g. Decision No 1082/2013/EU on serious cross-border threats to health                                                                                                                     | <input type="checkbox"/> Yes<br><input type="checkbox"/> No | <input type="checkbox"/> Yes<br><input type="checkbox"/> No |                  |
|                                                                            |                     | e.g. Council Directive 2008/114/EC of 8 December 2008 on the identification and designation of European critical infrastructures and the assessment of the need to improve their protection |                                                             |                                                             |                  |
| National legislation on implementing International Health Regulations 2005 |                     |                                                                                                                                                                                             | <input type="checkbox"/> Yes<br><input type="checkbox"/> No | <input type="checkbox"/> Yes<br><input type="checkbox"/> No |                  |
| National legislation on implementing Decision No 1082/2013/EU              |                     |                                                                                                                                                                                             | <input type="checkbox"/> Yes<br><input type="checkbox"/> No | <input type="checkbox"/> Yes<br><input type="checkbox"/> No |                  |
| National health legislation/policies                                       |                     |                                                                                                                                                                                             | <input type="checkbox"/> Yes<br><input type="checkbox"/> No | <input type="checkbox"/> Yes<br><input type="checkbox"/> No |                  |
| National communicable disease legislation/policies                         |                     |                                                                                                                                                                                             | <input type="checkbox"/> Yes<br><input type="checkbox"/> No | <input type="checkbox"/> Yes<br><input type="checkbox"/> No |                  |
| National legislation related to COVID-19                                   |                     |                                                                                                                                                                                             | <input type="checkbox"/> Yes<br><input type="checkbox"/> No | <input type="checkbox"/> Yes<br><input type="checkbox"/> No |                  |
| National maritime legislation/policies                                     |                     |                                                                                                                                                                                             | <input type="checkbox"/> Yes<br><input type="checkbox"/> No | <input type="checkbox"/> Yes<br><input type="checkbox"/> No |                  |
| National crisis legislation/policies (Civil protection/defense)            |                     |                                                                                                                                                                                             | <input type="checkbox"/> Yes<br><input type="checkbox"/> No | <input type="checkbox"/> Yes<br><input type="checkbox"/> No |                  |
| National emergency management legislation/policies                         |                     |                                                                                                                                                                                             | <input type="checkbox"/> Yes<br><input type="checkbox"/> No | <input type="checkbox"/> Yes<br><input type="checkbox"/> No |                  |
| National/regional public health emergency response plans                   |                     |                                                                                                                                                                                             | <input type="checkbox"/> Yes<br><input type="checkbox"/> No | <input type="checkbox"/> Yes<br><input type="checkbox"/> No |                  |
| Regulatory agency documents (from customs, biosecurity, police, military)  |                     |                                                                                                                                                                                             | <input type="checkbox"/> Yes<br><input type="checkbox"/> No | <input type="checkbox"/> Yes<br><input type="checkbox"/> No |                  |
| Industry regulations and plans                                             |                     |                                                                                                                                                                                             | <input type="checkbox"/> Yes<br><input type="checkbox"/> No | <input type="checkbox"/> Yes<br><input type="checkbox"/> No |                  |

|                                                                                                                                             |  |  |                                                             |                                                             |  |
|---------------------------------------------------------------------------------------------------------------------------------------------|--|--|-------------------------------------------------------------|-------------------------------------------------------------|--|
| Local maritime regulations and plans                                                                                                        |  |  | <input type="checkbox"/> Yes<br><input type="checkbox"/> No | <input type="checkbox"/> Yes<br><input type="checkbox"/> No |  |
| Local public health emergency response plans                                                                                                |  |  | <input type="checkbox"/> Yes<br><input type="checkbox"/> No | <input type="checkbox"/> Yes<br><input type="checkbox"/> No |  |
| Policies and contingency plans from nearby airports (if applicable)                                                                         |  |  | <input type="checkbox"/> Yes<br><input type="checkbox"/> No | <input type="checkbox"/> Yes<br><input type="checkbox"/> No |  |
| Policies and contingency plans from nearby ground crossing stations (if applicable)                                                         |  |  | <input type="checkbox"/> Yes<br><input type="checkbox"/> No | <input type="checkbox"/> Yes<br><input type="checkbox"/> No |  |
| Local legislation related to COVID-19                                                                                                       |  |  | <input type="checkbox"/> Yes<br><input type="checkbox"/> No | <input type="checkbox"/> Yes<br><input type="checkbox"/> No |  |
| Local civil protection plan                                                                                                                 |  |  | <input type="checkbox"/> Yes<br><input type="checkbox"/> No | <input type="checkbox"/> Yes<br><input type="checkbox"/> No |  |
| Operator security plans (framework of Directive 2008/114/EC)                                                                                |  |  | <input type="checkbox"/> Yes<br><input type="checkbox"/> No | <input type="checkbox"/> Yes<br><input type="checkbox"/> No |  |
| General port emergency plan                                                                                                                 |  |  | <input type="checkbox"/> Yes<br><input type="checkbox"/> No | <input type="checkbox"/> Yes<br><input type="checkbox"/> No |  |
| Port policy, operational plan, safety plan and emergency plan                                                                               |  |  | <input type="checkbox"/> Yes<br><input type="checkbox"/> No | <input type="checkbox"/> Yes<br><input type="checkbox"/> No |  |
| Description of port facilities<br>a) port site plan<br>b) safety equipment register<br>c) map of locations<br>d) diagram of port facilities |  |  | <input type="checkbox"/> Yes<br><input type="checkbox"/> No | <input type="checkbox"/> Yes<br><input type="checkbox"/> No |  |
| Service provider operational capability documents and contracts                                                                             |  |  | <input type="checkbox"/> Yes<br><input type="checkbox"/> No | <input type="checkbox"/> Yes<br><input type="checkbox"/> No |  |
| Port vector management plan                                                                                                                 |  |  | <input type="checkbox"/> Yes<br><input type="checkbox"/> No | <input type="checkbox"/> Yes<br><input type="checkbox"/> No |  |
| Previous public health or emergency plans for port                                                                                          |  |  | <input type="checkbox"/> Yes<br><input type="checkbox"/> No | <input type="checkbox"/> Yes<br><input type="checkbox"/> No |  |
| Existing “after action” or “post incident” reports/reviews from past port public health responses                                           |  |  | <input type="checkbox"/> Yes<br><input type="checkbox"/> No | <input type="checkbox"/> Yes<br><input type="checkbox"/> No |  |
| Results from WHO Core Capacity Assessment Tool (if applicable)                                                                              |  |  | <input type="checkbox"/> Yes<br><input type="checkbox"/> No | <input type="checkbox"/> Yes<br><input type="checkbox"/> No |  |

|                                                                                                                                                                                                                                                                                                                                       |  |  |                                                             |                                                             |  |
|---------------------------------------------------------------------------------------------------------------------------------------------------------------------------------------------------------------------------------------------------------------------------------------------------------------------------------------|--|--|-------------------------------------------------------------|-------------------------------------------------------------|--|
| <p>Statistical data related to the port:</p> <p>a) Number of ship visits and types of ships</p> <p>b) Volume passengers/crew and origin and others (e.g. technicians, harbor pilots, truck drivers etc.)</p> <p>c) Types of cargo handled</p> <p>d) Cruise ship itineraries and previous and next ports of call for ships calling</p> |  |  | <input type="checkbox"/> Yes<br><input type="checkbox"/> No | <input type="checkbox"/> Yes<br><input type="checkbox"/> No |  |
| Guidance on public health, communication disease, international travel, ship and ports prepared by WHO and IMO                                                                                                                                                                                                                        |  |  | <input type="checkbox"/> Yes<br><input type="checkbox"/> No | <input type="checkbox"/> Yes<br><input type="checkbox"/> No |  |
| Guidance documents related to COVID-19, international travel, ships and ports prepared by global and European agencies                                                                                                                                                                                                                |  |  | <input type="checkbox"/> Yes<br><input type="checkbox"/> No | <input type="checkbox"/> Yes<br><input type="checkbox"/> No |  |
| Public health emergency contingency plans (PHECP) of cruise ships calling at port                                                                                                                                                                                                                                                     |  |  | <input type="checkbox"/> Yes<br><input type="checkbox"/> No | <input type="checkbox"/> Yes<br><input type="checkbox"/> No |  |
| Cruise ship and port agreements for COVID-19 event management                                                                                                                                                                                                                                                                         |  |  | <input type="checkbox"/> Yes<br><input type="checkbox"/> No | <input type="checkbox"/> Yes<br><input type="checkbox"/> No |  |
| Any other relevant local rules/regulations                                                                                                                                                                                                                                                                                            |  |  | <input type="checkbox"/> Yes<br><input type="checkbox"/> No | <input type="checkbox"/> Yes<br><input type="checkbox"/> No |  |
