# Supplementary material for: Re-Starting the Cruise Sector during the COVID-19 Pandemic in Greece: Assessing Effectiveness of Port Contingency Planning
Source: MDPI journal article supplement (doi:10.3390/ijerph192013262), 2022-10-14
Supplement: s1 [file s1]

# Roles and responsibilities for COVID-19 preparedness and response

**Introductory note:**

The structured template below outlines specific responsibilities and tasks required for preparedness and response to COVID-19 events. It was developed to support *Port A*’s core planning team to identify and record:

- 1) *General and specific tasks for COVID-19 preparedness and management at Port A*
- 2) *Agencies at local/regional/national level responsible for each task*
- 3) *Contact details of liaison persons for each responsible agency (including alternate liaison person)*

**General tasks for the Preparedness phase (A) and Response phase (B) are sub-divided into specific tasks.**

For each specific task it is recommended to record the following:

- *Brief task description*
- *Responsible agency (e.g. committee, competent authority, co-competent authority/ service provider)*
- *Liaison person contact details (main contact and alternate contact)*

**\*\*Please note this is a non-exhaustive list, and additional tasks can be added or modified.**

**Preparedness phase (A)** tasks are categorized by:

- *1A: Tasks related to defining public health capacities*
- *2A: Tasks related to monitoring public health capacities*

**Response phase (B)** tasks are categorized by:

- *1B: Tasks for management of a COVID-19 event by Port A*
- *2B: Tasks related to communication during COVID-19 event response*

A. PREPAREDNESS PHASE

1A. Tasks for defining public health capacities

| GENERAL TASK A1: Isolation capacities  |                                                                                                                                   |                                                                                                     |                                                            |
|----------------------------------------|-----------------------------------------------------------------------------------------------------------------------------------|-----------------------------------------------------------------------------------------------------|------------------------------------------------------------|
| Task no.                               | Specific task description                                                                                                         | Responsible agency<br>(committee, competent authority, co-competent authority/<br>service provider) | Liaison persons<br>1. Main contact<br>2. Alternate contact |
| A1.1.                                  | Arrange pre-designated isolation facilities ashore (e.g. COVID-19 hotels) for cases not requiring hospitalization                 | • .....                                                                                             | 1. ....<br>2. ....                                         |
|                                        |                                                                                                                                   | • .....                                                                                             | 1. ....<br>2. ....                                         |
| A1.2.                                  | Define existing/ maximum capacity available to individually isolate (with their own designated bathroom) confirmed COVID-19 cases | • .....                                                                                             | 1. ....<br>2. ....                                         |
| A1.3.                                  | Define maximum threshold of isolation capacities for stopping cruise ship calls                                                   | • .....                                                                                             | 1. ....<br>2. ....                                         |
| GENERAL TASK A2: Quarantine capacities |                                                                                                                                   |                                                                                                     |                                                            |
| Task no.                               | Specific task description                                                                                                         | Responsible agency<br>(committee, competent authority, co-competent authority/<br>service provider) | Liaison persons<br>1. Main contact<br>2. Alternate contact |
| A2.1.                                  | Arrange pre-designated quarantine facilities ashore (e.g. COVID-19 hotels) for quarantine of close contacts                       | • .....                                                                                             | 1. ....<br>2. ....                                         |
|                                        |                                                                                                                                   | • .....                                                                                             | 1. ....<br>2. ....                                         |
| A2.2.                                  | Define existing/ maximum capacity available to quarantine close contacts                                                          | • .....                                                                                             | 1. ....<br>2. ....                                         |
| A2.3.                                  | Define maximum threshold of quarantine capacities for stopping cruise ship calls                                                  | • .....                                                                                             | 1. ....<br>2. ....                                         |

| GENERAL TASK A3: Hospitalization capacities |                                                                                                                                      |                                                                                                     |                                                            |
|---------------------------------------------|--------------------------------------------------------------------------------------------------------------------------------------|-----------------------------------------------------------------------------------------------------|------------------------------------------------------------|
| Task no.                                    | Specific task description                                                                                                            | Responsible agency<br>(committee, competent authority, co-competent authority/<br>service provider) | Liaison persons<br>1. Main contact<br>2. Alternate contact |
| A3.1.                                       | Define/arrange hospitals in local area with capacity to provide care for COVID-19 cases (including ICU care)                         | • .....                                                                                             | 1. ....<br>2. ....                                         |
| A3.2.                                       | Define existing and maximum capacity for hospitalization of COVID-19 cases in local area (including ICU care)                        | • .....                                                                                             | 1. ....<br>2. ....                                         |
| A3.3.                                       | Define maximum threshold of hospitalization capacities for stopping cruise ship calls                                                | • .....                                                                                             | 1. ....<br>2. ....                                         |
| GENERAL TASK A4: Alternate port capacities  |                                                                                                                                      |                                                                                                     |                                                            |
| Task no.                                    | Specific task description                                                                                                            | Responsible agency<br>(committee, competent authority, co-competent authority/<br>service provider) | Liaison persons<br>1. Main contact<br>2. Alternate contact |
| A4.1.                                       | Define alternate ports with capacities to manage outbreaks and situations where alternate ports asked to manage public health events | • .....                                                                                             | 1. ....<br>2. ....                                         |
| GENERAL TASK A5: Transport capacities       |                                                                                                                                      |                                                                                                     |                                                            |
| Task no.                                    | Specific task description                                                                                                            | Responsible agency<br>(committee, competent authority, co-competent authority/<br>service provider) | Liaison persons<br>1. Main contact<br>2. Alternate contact |
| A5.1.                                       | Pre-define arrangements for transferring cases/contacts to isolation/ quarantine facilities                                          | • .....                                                                                             | 1. ....<br>2. ....                                         |
| A5.2.                                       | Pre-define arrangements for transport means for transferring cases to hospital/medical facility                                      | • .....                                                                                             | 1. ....<br>2. ....                                         |

| GENERAL TASK A6: Diagnostic laboratory capacities                                                                                                 |                                                                                                     |                                                                                                     |                                                            |
|---------------------------------------------------------------------------------------------------------------------------------------------------|-----------------------------------------------------------------------------------------------------|-----------------------------------------------------------------------------------------------------|------------------------------------------------------------|
| Task no.                                                                                                                                          | Specific task description                                                                           | Responsible agency<br>(committee, competent authority, co-competent authority/<br>service provider) | Liaison persons<br>1. Main contact<br>2. Alternate contact |
| A6.1.                                                                                                                                             | Identify diagnostic laboratory facilities/capacities for SARS-CoV-2                                 | <ul style="list-style-type: none"><li>.....</li></ul>                                               | 1. ....<br>2. ....                                         |
| GENERAL TASK A7: Preparations for coordination of public health event management and ensuring interoperability with cruise ship contingency plans |                                                                                                     |                                                                                                     |                                                            |
| Task no.                                                                                                                                          | Specific task description                                                                           | Responsible agency<br>(committee, competent authority, co-competent authority/<br>service provider) | Liaison persons<br>1. Main contact<br>2. Alternate contact |
| A7.1.                                                                                                                                             | Coordinate public health event management and investigation at port level                           | <ul style="list-style-type: none"><li>.....</li></ul>                                               | 1. ....<br>2. ....                                         |
|                                                                                                                                                   |                                                                                                     | <ul style="list-style-type: none"><li>.....</li></ul>                                               | 1. ....<br>2. ....                                         |
|                                                                                                                                                   |                                                                                                     | <ul style="list-style-type: none"><li>.....</li></ul>                                               | 1. ....<br>2. ....                                         |
| A7.2.                                                                                                                                             | Define situations where help will be asked from central level authorities                           | <ul style="list-style-type: none"><li>.....</li></ul>                                               | 1. ....<br>2. ....                                         |
| A7.3.                                                                                                                                             | Review ship’s contingency plans/written assurance statements for interoperability with port’s PHECP | <ul style="list-style-type: none"><li>.....</li></ul>                                               | 1. ....<br>2. ....                                         |

A. PREPAREDNESS PHASE

2A. Tasks for monitoring public health capacities

| GENERAL TASK A8: Regularly monitoring public health capacities                          |                                                                                                                                                                                                                                                               |                                                                                                     |                                                            |
|-----------------------------------------------------------------------------------------|---------------------------------------------------------------------------------------------------------------------------------------------------------------------------------------------------------------------------------------------------------------|-----------------------------------------------------------------------------------------------------|------------------------------------------------------------|
| Task no.                                                                                | Specific task description                                                                                                                                                                                                                                     | Responsible agency<br>(committee, competent authority, co-competent authority/<br>service provider) | Liaison persons<br>1. Main contact<br>2. Alternate contact |
| A8.1.                                                                                   | Regular updates about number of available isolation rooms in local area                                                                                                                                                                                       | • .....                                                                                             | 1. ....<br>2. ....                                         |
| A8.2.                                                                                   | Regular updates about number of available rooms at quarantine rooms in local area                                                                                                                                                                             | • .....                                                                                             | 1. ....<br>2. ....                                         |
| A8.3.                                                                                   | Regular updates about number of available beds to care for COVID-19 cases (including ICU beds) at each facility                                                                                                                                               | • .....                                                                                             | 1. ....<br>2. ....                                         |
| A8.4.                                                                                   | Regular updates on existing capacities available to transport asymptomatic/mild COVID-19 cases or close contacts to isolation or quarantine                                                                                                                   | • .....                                                                                             | 1. ....<br>2. ....                                         |
| GENERAL TASK A9: Training activities                                                    |                                                                                                                                                                                                                                                               |                                                                                                     |                                                            |
| Task no.                                                                                | Specific task description                                                                                                                                                                                                                                     | Responsible agency<br>(committee, competent authority, co-competent authority/<br>service provider) | Liaison persons<br>1. Main contact<br>2. Alternate contact |
| A9.1.                                                                                   | Training of staff and verification of training                                                                                                                                                                                                                | • .....                                                                                             | 1. ....<br>2. ....                                         |
| GENERAL TASK A10: Routine measures at terminal / measures in response to COVID-19 event |                                                                                                                                                                                                                                                               |                                                                                                     |                                                            |
| Task no.                                                                                | Specific task description                                                                                                                                                                                                                                     | Responsible agency<br>(committee, competent authority, co-competent authority/<br>service provider) | Liaison persons<br>1. Main contact<br>2. Alternate contact |
| A10.1.                                                                                  | <b>Ensure compliance with personal protective measures at terminal</b> <ul style="list-style-type: none"> <li>• Face mask rules</li> <li>• Hand hygiene</li> <li>• Physical distancing (passenger lanes, floor markers)</li> <li>• Different flows</li> </ul> | • .....                                                                                             | 1. ....<br>2. ....                                         |
| A10.2.                                                                                  | <b>Monitor and replace:</b>                                                                                                                                                                                                                                   | • .....                                                                                             | 1. ....<br>2. ....                                         |

PORT A – Structured template: Task definitions and responsibilities for COVID-19 specific public health emergency contingency plan (PHECP) development

|         |                                                                                                                                                                                                                                                                       |                                                           |                    |
|---------|-----------------------------------------------------------------------------------------------------------------------------------------------------------------------------------------------------------------------------------------------------------------------|-----------------------------------------------------------|--------------------|
|         | <ul style="list-style-type: none"> <li>• EU certified PPE regularly (e.g. 3 sets of PPE per cruise ship call per staff)</li> <li>• hand hygiene items (soap, alcohol-based hand rub stations) around port facilities</li> <li>• Supplies in isolation area</li> </ul> |                                                           |                    |
| A10.3.  | <b>Ensure hand washing stations or alcohol-based hand rub stations placed in prominent areas of port facility (e.g. check-in/entrances)</b>                                                                                                                           | <ul style="list-style-type: none"> <li>• .....</li> </ul> | 1. ....<br>2. .... |
| A10.4.  | <b>Work schedule management at port (work and break schedule review and adjustment to avoid overlap)</b>                                                                                                                                                              | <ul style="list-style-type: none"> <li>• .....</li> </ul> | 1. ....<br>2. .... |
| A10.5.  | <b>Health screening of terminal staff for entry to port/terminal (same screening protocols as travellers)</b>                                                                                                                                                         | <ul style="list-style-type: none"> <li>• .....</li> </ul> | 1. ....<br>2. .... |
| A10.6.  | <b>Diagnostic testing of terminal workers (if conducted)</b>                                                                                                                                                                                                          | <ul style="list-style-type: none"> <li>• .....</li> </ul> | 1. ....<br>2. .... |
| A10.7.  | <b>Develop, update and display health promotion material</b>                                                                                                                                                                                                          | <ul style="list-style-type: none"> <li>• .....</li> </ul> | 1. ....<br>2. .... |
| A10.8.  | <b>Ventilation management terminal stations</b>                                                                                                                                                                                                                       | <ul style="list-style-type: none"> <li>• .....</li> </ul> | 1. ....<br>2. .... |
| A10.9.  | <b>WC management at terminal stations</b>                                                                                                                                                                                                                             | <ul style="list-style-type: none"> <li>• .....</li> </ul> | 1. ....<br>2. .... |
| A10.10. | <b>Ensuring cleaning and disinfection of isolation area after each use</b>                                                                                                                                                                                            | <ul style="list-style-type: none"> <li>• .....</li> </ul> | 1. ....<br>2. .... |
| A10.11. | <b>Ensuring appropriate ventilation of isolation area</b>                                                                                                                                                                                                             | <ul style="list-style-type: none"> <li>• .....</li> </ul> | 1. ....<br>2. .... |

|                |                                                                                                                                                                         |         |                    |
|----------------|-------------------------------------------------------------------------------------------------------------------------------------------------------------------------|---------|--------------------|
| <b>A10.12.</b> | <b>Transport of possible/confirmed case to temporary isolation area at port</b>                                                                                         | • ..... | 1. ....<br>2. .... |
| <b>A10.13.</b> | <b>Care of possible/confirmed case at temporary isolation area at port</b>                                                                                              | • ..... | 1. ....<br>2. .... |
| <b>A10.14.</b> | <b>Record-keeping of personnel working in isolation area at port</b>                                                                                                    | • ..... | 1. ....<br>2. .... |
| <b>A10.15.</b> | <b>Decision about exit/entry screening measures for passengers at ports</b>                                                                                             | • ..... | 1. ....<br>2. .... |
| <b>A10.16.</b> | <b>Conduct of primary health screening measures for passengers at terminal (e.g. visual inspection, collection of health questionnaire and temperature measurement)</b> | • ..... | 1. ....<br>2. .... |
| <b>A10.17.</b> | <b>Conduct secondary screening of travellers (in depth interview, medical examination and laboratory examination, second temperature measurement etc.)</b>              | • ..... | 1. ....<br>2. .... |
| <b>A10.18.</b> | <b>Decision to restrict/refuse entry or exit of travellers at port</b>                                                                                                  | • ..... | 1. ....<br>2. .... |
| <b>A10.19.</b> | <b>Arrange for contact tracing of affected persons if possible case identified at port terminal</b>                                                                     | • ..... | 1. ....<br>2. .... |
| <b>A10.20.</b> | <b>Cleaning and disinfection of terminal facilities before and after each embarkation and ship visit</b>                                                                | • ..... | 1. ....<br>2. .... |
| <b>A10.21.</b> | <b>Special cleaning and disinfection protocols of terminal facilities after possible/confirmed case identified at terminal or if used terminal/port facilities</b>      | • ..... | 1. ....<br>2. .... |

|         |                                                                                                                                                                                                                     |                                                       |                    |
|---------|---------------------------------------------------------------------------------------------------------------------------------------------------------------------------------------------------------------------|-------------------------------------------------------|--------------------|
| A10.22. | Cleaning and disinfection of means of transport (e.g. buses, cars etc.) regularly and disinfection when in contact with possible/confirmed case (if different than above)                                           | <ul style="list-style-type: none"><li>.....</li></ul> | 1. ....<br>2. .... |
| A10.23. | Infectious waste management at port facilities                                                                                                                                                                      | <ul style="list-style-type: none"><li>.....</li></ul> | 1. ....<br>2. .... |
| A10.24. | Luggage disinfection of possible/confirmed cases                                                                                                                                                                    | <ul style="list-style-type: none"><li>.....</li></ul> | 1. ....<br>2. .... |
| A10.25. | Luggage tracking and management system for possible/confirmed cases                                                                                                                                                 | <ul style="list-style-type: none"><li>.....</li></ul> | 1. ....<br>2. .... |
| A10.26. | Disinfection of transport carts/cages after boarding procedure to/from ship                                                                                                                                         | <ul style="list-style-type: none"><li>.....</li></ul> | 1. ....<br>2. .... |
| A10.27. | Management of groups for shore-based excursions and facilitating compliance with physical distancing and separation from other travel groups, verifying PPE available and determining parking spaces for tour buses | <ul style="list-style-type: none"><li>.....</li></ul> | 1. ....<br>2. .... |

B. RESPONSE PHASE

1B. Tasks for management of COVID-19 event at port

| GENERAL TASK B1: COVID-19 public health emergency contingency plan |                                       |                                                                                                     |                                                            |
|--------------------------------------------------------------------|---------------------------------------|-----------------------------------------------------------------------------------------------------|------------------------------------------------------------|
| Task no.                                                           | Specific task description             | Responsible agency<br>(committee, competent authority, co-competent authority/<br>service provider) | Liaison persons<br>1. Main contact<br>2. Alternate contact |
| B1.1.                                                              | Activation of the port COVID-19 PHECP | <ul style="list-style-type: none"><li>.....</li></ul>                                               | 1. ....<br>2. ....                                         |



|                                                                              |                                                                                                                 |                                                                                                     |                                                            |
|------------------------------------------------------------------------------|-----------------------------------------------------------------------------------------------------------------|-----------------------------------------------------------------------------------------------------|------------------------------------------------------------|
| B1.2.                                                                        | Deactivation of the port COVID-19 PHECP                                                                         | <ul style="list-style-type: none"><li>.....</li></ul>                                               | 1. ....<br>2. ....                                         |
| GENERAL TASK B2: Detection of COVID-19 event                                 |                                                                                                                 |                                                                                                     |                                                            |
| Task no.                                                                     | Specific task description                                                                                       | Responsible agency<br>(committee, competent authority, co-competent authority/<br>service provider) | Liaison persons<br>1. Main contact<br>2. Alternate contact |
| B2.1.                                                                        | Receive Maritime Declaration of Health (MDH)                                                                    | <ul style="list-style-type: none"><li>.....</li></ul>                                               | 1. ....<br>2. ....                                         |
| B2.2.                                                                        | Notification from previous port of call                                                                         | <ul style="list-style-type: none"><li>.....</li></ul>                                               | 1. ....<br>2. ....                                         |
| B2.3.                                                                        | Notification through National Focal Point                                                                       | <ul style="list-style-type: none"><li>.....</li></ul>                                               | 1. ....<br>2. ....                                         |
| B2.4.                                                                        | Notification during inspection                                                                                  | <ul style="list-style-type: none"><li>.....</li></ul>                                               | 1. ....<br>2. ....                                         |
| B2.5.                                                                        | Notification at port facilities (e.g. pre-board screening)                                                      | <ul style="list-style-type: none"><li>.....</li></ul>                                               | 1. ....<br>2. ....                                         |
| GENERAL TASK B3: COVID-19 event verification and preliminary risk assessment |                                                                                                                 |                                                                                                     |                                                            |
| Task no.                                                                     | Specific task description                                                                                       | Responsible agency<br>(committee, competent authority, co-competent authority/<br>service provider) | Liaison persons<br>1. Main contact<br>2. Alternate contact |
| B3.1.                                                                        | Verification of COVID-19 event<br>(e.g. collecting further information from ship agent/master/ other authority) | <ul style="list-style-type: none"><li>.....</li></ul>                                               | 1. ....<br>2. ....                                         |

|                                                          |                                                                                                  |                                                                                                     |                                                            |
|----------------------------------------------------------|--------------------------------------------------------------------------------------------------|-----------------------------------------------------------------------------------------------------|------------------------------------------------------------|
| B3.2.                                                    | Preliminary risk assessment once notified of COVID-19 event                                      | <ul style="list-style-type: none"><li>.....</li></ul>                                               | 1. ....<br>2. ....                                         |
| B3.3.                                                    | Initial communication to other authorities once COVID-19 event notified on board ship or at port | <ul style="list-style-type: none"><li>.....</li></ul>                                               | 1. ....<br>2. ....                                         |
| GENERAL TASK B4: Cruise ship authorization/free pratique |                                                                                                  |                                                                                                     |                                                            |
| Task no.                                                 | Specific task description                                                                        | Responsible agency<br>(committee, competent authority, co-competent authority/<br>service provider) | Liaison persons<br>1. Main contact<br>2. Alternate contact |
| B.4.1.                                                   | Allow or refuse entry of ship (cruise ship authorization procedure)                              | <ul style="list-style-type: none"><li>.....</li></ul>                                               | 1. ....<br>2. ....                                         |
| B4.2.                                                    | Permit free pratique with on-site visit including medical personnel                              | <ul style="list-style-type: none"><li>.....</li></ul>                                               | 1. ....<br>2. ....                                         |
| B4.3.                                                    | Determine docking area for the affected ships                                                    | <ul style="list-style-type: none"><li>.....</li></ul>                                               | 1. ....<br>2. ....                                         |
| B4.4.                                                    | Provide floating vessel (in context of free pratique) for transport of medical personnel         | <ul style="list-style-type: none"><li>.....</li></ul>                                               | 1. ....<br>2. ....                                         |
| B4.5.                                                    | Provision of customs documents, emergency materials and supplies for ship if needed              | <ul style="list-style-type: none"><li>.....</li></ul>                                               | 1. ....<br>2. ....                                         |
| GENERAL TASK B5: Health measures implementation          |                                                                                                  |                                                                                                     |                                                            |
| Task no.                                                 | Specific task description                                                                        | Responsible agency<br>(committee, competent authority, co-competent authority/<br>service provider) | Liaison persons<br>1. Main contact<br>2. Alternate contact |
| B5.1.                                                    | Conduct risk assessment of public health event at port level                                     |                                                                                                     |                                                            |

|        |                                                                                                                                              |         |                    |
|--------|----------------------------------------------------------------------------------------------------------------------------------------------|---------|--------------------|
| B5.2.  | Decision for health measures implementation                                                                                                  | • ..... | 1. ....<br>2. .... |
| B5.3.  | Send epidemiological data of the ship from local to central level                                                                            | • ..... | 1. ....<br>2. .... |
| B5.4.  | Assessment of case to decide if requires hospitalization ashore or can be transferred to isolation facility ashore                           | • ..... | 1. ....<br>2. .... |
| B5.5.  | Arrange medical evacuation from ship if needed                                                                                               | • ..... | 1. ....<br>2. .... |
| B5.6.  | Arrange for immediate isolation and testing of possible case                                                                                 | • ..... | 1. ....<br>2. .... |
| B5.7.  | Verification that passenger/crew locator form (PLF) completed by all pax. and crew on board ship                                             | • ..... | 1. ....<br>2. .... |
| B5.8.  | Collect information about contacts of possible/confirmed case (on board ship or ashore)                                                      | • ..... | 1. ....<br>2. .... |
| B5.9.  | Disembarkation of confirmed COVID-19 case                                                                                                    | • ..... | 1. ....<br>2. .... |
| B5.10. | Disembarkation of close contacts                                                                                                             | • ..... | 1. ....<br>2. .... |
| B5.11. | Determine which hospitals/medical facilities in local area receive patients and inform medical facility/hospital of arrival of COVID-19 case | • ..... | 1. ....<br>2. .... |

|               |                                                                                                   |                                                           |                    |
|---------------|---------------------------------------------------------------------------------------------------|-----------------------------------------------------------|--------------------|
| <b>B5.12.</b> | <b>Inform ashore designated isolation/quarantine facility about arrival COVID-19 case</b>         | <ul style="list-style-type: none"> <li>• .....</li> </ul> | 1. ....<br>2. .... |
| <b>B5.13.</b> | <b>Transport of COVID-19 case to hospital if required</b>                                         | <ul style="list-style-type: none"> <li>• .....</li> </ul> | 1. ....<br>2. .... |
| <b>B5.14.</b> | <b>Arrange interpreters</b>                                                                       | <ul style="list-style-type: none"> <li>• .....</li> </ul> | 1. ....<br>2. .... |
| <b>B5.15.</b> | <b>Transport of COVID-19 case (e.g. asymptomatic or mildly symptomatic) to isolation facility</b> | <ul style="list-style-type: none"> <li>• .....</li> </ul> | 1. ....<br>2. .... |
| <b>B5.16.</b> | <b>Health monitoring of cases in isolation facilities</b>                                         | <ul style="list-style-type: none"> <li>• .....</li> </ul> | 1. ....<br>2. .... |
| <b>B5.17.</b> | <b>Registration of COVID-19 case in national web-based system</b>                                 | <ul style="list-style-type: none"> <li>• .....</li> </ul> | 1. ....<br>2. .... |
| <b>B5.18.</b> | <b>Disembarkation of close contacts</b>                                                           | <ul style="list-style-type: none"> <li>• .....</li> </ul> | 1. ....<br>2. .... |
| <b>B5.19.</b> | <b>Support for persons in isolation (e.g. providing food, medications etc.)</b>                   | <ul style="list-style-type: none"> <li>• .....</li> </ul> | 1. ....<br>2. .... |
| <b>B5.20.</b> | <b>Decision to release cases from isolation facilities</b>                                        | <ul style="list-style-type: none"> <li>• .....</li> </ul> | 1. ....<br>2. .... |
| <b>B5.21.</b> | <b>Transport of close contacts to designated quarantine facility</b>                              | <ul style="list-style-type: none"> <li>• .....</li> </ul> | 1. ....<br>2. .... |

|               |                                                                                                                                                                                                                                                                                                                                                                                        |         |                    |
|---------------|----------------------------------------------------------------------------------------------------------------------------------------------------------------------------------------------------------------------------------------------------------------------------------------------------------------------------------------------------------------------------------------|---------|--------------------|
| <b>B5.22.</b> | <b>Registration of close contacts in national web-based system</b>                                                                                                                                                                                                                                                                                                                     | • ..... | 1. ....<br>2. .... |
| <b>B5.23.</b> | <b>Active health monitoring of close contacts ashore</b>                                                                                                                                                                                                                                                                                                                               | • ..... | 1. ....<br>2. .... |
| <b>B5.24.</b> | <b>Support for persons in isolation (e.g. providing food, medications etc.)</b>                                                                                                                                                                                                                                                                                                        | • ..... | 1. ....<br>2. .... |
| <b>B5.25.</b> | <b>Psychological support for people in quarantine and isolation if needed</b>                                                                                                                                                                                                                                                                                                          | • ..... | 1. ....<br>2. .... |
| <b>B5.26.</b> | <b>Arrangement of early testing for all symptomatic and asymptomatic close contacts of confirmed case</b>                                                                                                                                                                                                                                                                              | • ..... | 1. ....<br>2. .... |
| <b>B5.27.</b> | <b>Conduct of contact tracing if needed</b>                                                                                                                                                                                                                                                                                                                                            | • ..... | 1. ....<br>2. .... |
| <b>B5.28.</b> | <b>Arrange of repatriation of travellers</b>                                                                                                                                                                                                                                                                                                                                           | • ..... | 1. ....<br>2. .... |
| <b>B5.29.</b> | <b>Conduct ship inspection if confirmed case identified on board</b>                                                                                                                                                                                                                                                                                                                   | • ..... | 1. ....<br>2. .... |
| <b>B5.30.</b> | <b>Supervision and implementation of health measures implemented on ship</b> <ul style="list-style-type: none"> <li>• Cleaning and disinfection of contaminated areas/objects</li> <li>• Waste management / disposal</li> <li>• Replace air filters</li> <li>• Preventive measures for next voyage (e.g. active surveillance)</li> <li>• Any other health measures required</li> </ul> | • ..... | 1. ....<br>2. .... |

|        |                                                                                                                                                                                 |         |                    |
|--------|---------------------------------------------------------------------------------------------------------------------------------------------------------------------------------|---------|--------------------|
| B5.31. | Review proof of measures and take decision if satisfied with health measures implemented on board ship, note measures in Ship Sanitation Certificate                            | • ..... | 1. ....<br>2. .... |
| B5.32. | At departure inform competent authority at next known port of call about evidence found on ship and control measures implemented/required                                       | • ..... | 1. ....<br>2. .... |
| B5.33. | Treatment of baggage, cargo, containers, conveyances, goods, postal parcels or human remains to remove infection if needed                                                      | • ..... | 1. ....<br>2. .... |
| B5.34. | Safe handling and transport of human remains                                                                                                                                    | • ..... | 1. ....<br>2. .... |
| B5.35. | Isolation and quarantine of ships when public health risk on board                                                                                                              | • ..... | 1. ....<br>2. .... |
| B5.36. | Seizure / destruction of infected ship and other inanimate objects                                                                                                              | • ..... | 1. ....<br>2. .... |
| B5.37. | Supervision of and removal of safe disposal of contaminated matter from ship                                                                                                    | • ..... | 1. ....<br>2. .... |
| B5.38. | Interview possible case and obtain medical history and detailed travel history of possible case and close contacts if possible case detected at port during pre-board screening | • ..... | 1. ....<br>2. .... |
| B5.39. | Review proof of medical examination or microbiological diagnostic test as needed                                                                                                | • ..... | 1. ....<br>2. .... |
| B5.40. | Review proof of vaccination as needed                                                                                                                                           | • ..... | 1. ....<br>2. .... |

B. RESPONSE PHASE

2B. Channels of communication during COVID-19 event management

| GENERAL TASK B6: Internal communications |                                                                                               |                                                                                                  |                                                            |
|------------------------------------------|-----------------------------------------------------------------------------------------------|--------------------------------------------------------------------------------------------------|------------------------------------------------------------|
| Task no.                                 | Specific task description                                                                     | Responsible agency<br>(committee, competent authority, co-competent authority/ service provider) | Liaison persons<br>1. Main contact<br>2. Alternate contact |
| B6.1.                                    | Internal communication within port                                                            | <ul style="list-style-type: none"><li>.....</li></ul>                                            | 1. ....<br>2. ....                                         |
| B6.2.                                    | Communication with IHR national focal point (NFP)                                             | <ul style="list-style-type: none"><li>.....</li></ul>                                            | 1. ....<br>2. ....                                         |
| B6.3.                                    | Communicate with media about public health event (public information/media management)        | <ul style="list-style-type: none"><li>.....</li></ul>                                            | 1. ....<br>2. ....                                         |
| B6.4.                                    | Communicate to alternate port and ask to manage public health event if capacities unavailable | <ul style="list-style-type: none"><li>.....</li></ul>                                            | 1. ....<br>2. ....                                         |
