# Supplementary material for: Re-Starting the Cruise Sector during the COVID-19 Pandemic in Greece: Assessing Effectiveness of Port Contingency Planning
Source: MDPI journal article supplement (doi:10.3390/ijerph192013262), 2022-10-14
Supplement: s1 [file s1]

## IN-ACTION REVIEW: ANALYSIS OF COVID-19 EVENTS – Facilitated discussion templates

| SESSION 1: CRUISE SHIP A       |                                                                                          |       |            |
|--------------------------------|------------------------------------------------------------------------------------------|-------|------------|
| Duration:                      | 35 minutes                                                                               | Time: | 9:40-10:15 |
| Method of review:              | Root-Cause Analysis                                                                      |       |            |
| Root-Cause Analysis Questions: |                                                                                          |       |            |
| <b>A1</b>                      | <i>At first look what was the problem? How do we define the problem?</i>                 |       |            |
| <b>A2</b>                      | <i>What was the impact of the problem? What did it cause?</i>                            |       |            |
| <b>B1</b>                      | <i>What caused the problem described from A1?</i>                                        |       |            |
| <b>C1</b>                      | <i>What was the cause of the reasons listed in B1?</i>                                   |       |            |
| <b>D1</b>                      | <i>What are possible solutions to prevent the root causes from C1?</i>                   |       |            |
| <b>E1</b>                      | <i>Is there anything you think could have been done differently from your authority?</i> |       |            |

|                                                                                            |                                                                                    |                                                                                            |
|--------------------------------------------------------------------------------------------|------------------------------------------------------------------------------------|--------------------------------------------------------------------------------------------|
| <b>A1. Problem:</b> <ul style="list-style-type: none"> <li>.....</li> <li>.....</li> </ul> |  | <b>A2. Impacts:</b> <ul style="list-style-type: none"> <li>.....</li> <li>.....</li> </ul> |
|--------------------------------------------------------------------------------------------|------------------------------------------------------------------------------------|--------------------------------------------------------------------------------------------|

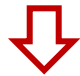

| <b>B1. Why did this happen:</b>        | ..... | ..... | ..... | ..... |
|----------------------------------------|-------|-------|-------|-------|
| <b>C1. Root Cause:</b>                 | ..... | ..... | ..... | ..... |
| <b>D1. Possible actions:</b>           | ..... | ..... | ..... | ..... |
| E1. Lookback                           |       |       |       |       |
| Port authority representative:         |       |       |       |       |
| Local Health Authority representative: |       |       |       |       |
| Local Port Agency representative:      |       |       |       |       |
| Coast guard representative:            |       |       |       |       |

IN-ACTION REVIEW: ANALYSIS OF COVID-19 EVENTS – Facilitated discussion templates

| SESSION 2: CRUISE SHIP B              |       |             |
|---------------------------------------|-------|-------------|
| 35 minutes                            | Time: | 10:15-10:50 |
| Analyse challenges and good practices |       |             |

|                     |                                                                     |
|---------------------|---------------------------------------------------------------------|
|                     | <b>CHALLENGE 1:</b>                                                 |
| Example             | <ul style="list-style-type: none"><li>.....</li><li>.....</li></ul> |
| Impact              | <ul style="list-style-type: none"><li>.....</li><li>.....</li></ul> |
| Limiting conditions | <ul style="list-style-type: none"><li>.....</li><li>.....</li></ul> |
| Actions             | <ul style="list-style-type: none"><li>.....</li><li>.....</li></ul> |

|                                          |                                                                     |
|------------------------------------------|---------------------------------------------------------------------|
|                                          | <b>GOOD PRACTICE 1:</b>                                             |
| Example                                  | <ul style="list-style-type: none"><li>.....</li><li>.....</li></ul> |
| Impact                                   | <ul style="list-style-type: none"><li>.....</li><li>.....</li></ul> |
| Enabling conditions                      | <ul style="list-style-type: none"><li>.....</li><li>.....</li></ul> |
| Action needed to maintain good practice? | <ul style="list-style-type: none"><li>.....</li><li>.....</li></ul> |

## IN-ACTION REVIEW: ANALYSIS OF COVID-19 EVENTS – Facilitated discussion templates

|                                       |                                                                                          |              |             |  |
|---------------------------------------|------------------------------------------------------------------------------------------|--------------|-------------|--|
| <b>SESSION 3: CRUISE SHIP C</b>       |                                                                                          |              |             |  |
| <b>Duration:</b>                      | 20 minutes                                                                               | <b>Time:</b> | 10:50-11:10 |  |
| <b>Method of review:</b>              | Root-Cause Analysis                                                                      |              |             |  |
| <b>Root-Cause Analysis Questions:</b> |                                                                                          |              |             |  |
| <b>A1</b>                             | <i>At first look what was the problem? How do we define the problem?</i>                 |              |             |  |
| <b>A2</b>                             | <i>What was the impact of the problem? What did it cause?</i>                            |              |             |  |
| <b>B1</b>                             | <i>What caused the problem described from A1?</i>                                        |              |             |  |
| <b>C1</b>                             | <i>What was the cause of the reasons listed in B1?</i>                                   |              |             |  |
| <b>D1</b>                             | <i>What are possible solutions to prevent the root causes from C1?</i>                   |              |             |  |
| <b>E1</b>                             | <i>Is there anything you think could have been done differently from your authority?</i> |              |             |  |

  

|                                                                            |
|----------------------------------------------------------------------------|
| <b>A1. Problem:</b>                                                        |
| <ul style="list-style-type: none"> <li>• .....</li> <li>• .....</li> </ul> |

|                                                                            |
|----------------------------------------------------------------------------|
| <b>A2. Impacts:</b>                                                        |
| <ul style="list-style-type: none"> <li>• .....</li> <li>• .....</li> </ul> |

  

|                                 |       |       |       |       |
|---------------------------------|-------|-------|-------|-------|
| <b>B1. Why did this happen:</b> | ..... | ..... | ..... | ..... |
| <b>C1. Root Cause:</b>          | ..... | ..... | ..... | ..... |
| <b>D1. Possible actions:</b>    | ..... | ..... | ..... | ..... |

  

|                                        |  |
|----------------------------------------|--|
| <b>E1. Lookback</b>                    |  |
| Port authority representative:         |  |
| Local Health Authority representative: |  |
| Local Port Agency representative:      |  |
| Coast guard representative:            |  |

**IN-ACTION REVIEW: ANALYSIS OF COVID-19 EVENTS – Facilitated discussion templates**

| <b>SESSION 4: Review of good practices for COVID-19 event management</b> |                       |              |             |
|--------------------------------------------------------------------------|-----------------------|--------------|-------------|
| <b>Duration:</b>                                                         | 15 minutes            | <b>Time:</b> | 11:10-11:25 |
| <b>Method of review:</b>                                                 | Facilitated Look Back |              |             |

|                                       |                                                                                                                   |
|---------------------------------------|-------------------------------------------------------------------------------------------------------------------|
| <b>Description of event:</b>          | <i>Describe if possible an example of COVID-19 event at port that went well, that went according to plan etc.</i> |
| <b>What went well:</b>                | <i>During management of the event, what went well? What were good practices that were implemented?</i>            |
| <b>Conditions for good practices:</b> | <i>How was the management able to go well? What facilitates the good practice?</i>                                |
| <b>How to sustain:</b>                | <i>What is required for the good practice to be maintained?</i>                                                   |

| SESSION 5: URGENT ISSUES AND CHALLENGES FORESEEN FOR 2022 |                  |       |             |
|-----------------------------------------------------------|------------------|-------|-------------|
| Duration:                                                 | 25 minutes       | Time: | 11:25-11:50 |
| Method of review:                                         | Group discussion |       |             |

Current challenges the port is facing or foresee they may face in ongoing COVID-19 response:

|                                      |                                                                         |
|--------------------------------------|-------------------------------------------------------------------------|
| Challenge:                           | <ul style="list-style-type: none"><li>• .....</li><li>• .....</li></ul> |
| Concrete examples if available:      | <ul style="list-style-type: none"><li>• .....</li><li>• .....</li></ul> |
| Discussion about possible solutions: | <ul style="list-style-type: none"><li>• .....</li><li>• .....</li></ul> |
