# Supplementary material for: Re-Starting the Cruise Sector during the COVID-19 Pandemic in Greece: Assessing Effectiveness of Port Contingency Planning
Source: Int J Environ Res Public Health. 2022 Oct 14;19(20):13262. doi: 10.3390/ijerph192013262 (PMC9603745; doi:10.3390/ijerph192013262)
Supplement: Supplementary file 1 [file ijerph-19-13262-s001.zip]

Archive with 4 entries (4 files):
- FigureS1_IAR_COVID_Timeline.jpg
- TableS1_PHECP_documentation.pdf
- TableS2_Task_Definition.pdf
- TableS3_IAR_Discussion_Templates.pdf
